# Supplementary material for: The Anti-Amyloidogenic Action of Doxycycline: A Molecular Dynamics Study on the Interaction with Aβ42
Source: Int J Mol Sci. 2019 Sep 19;20(18):4641. doi: 10.3390/ijms20184641 (PMC6769662; doi:10.3390/ijms20184641)
Supplement: Supplementary file 1 [file ijms-20-04641-s001.pdf]

## **Supplementary Information**

### **The anti-amyloidogenic action of Doxycycline: a molecular dynamics study on the interaction with Abeta**

Alfonso Gautieri<sup>a,\*</sup>, Marco Gobbi<sup>b</sup>, Marten Beeg<sup>b</sup>, Federica Rigoldi<sup>a</sup>, Laura Colombo<sup>b</sup>, Mario Salmona<sup>b,\*</sup>

<sup>a</sup> Biomolecular Engineering Lab, Dipartimento di Elettronica, Informazione e Bioingegneria, Politecnico di Milano, Piazza Leonardo da Vinci 32, 20133 Milano (Italy)

<sup>b</sup> Istituto di Ricerche Farmacologiche Mario Negri IRCCS, Via Mario Negri 2, 20156 Milano (Italy)

**A**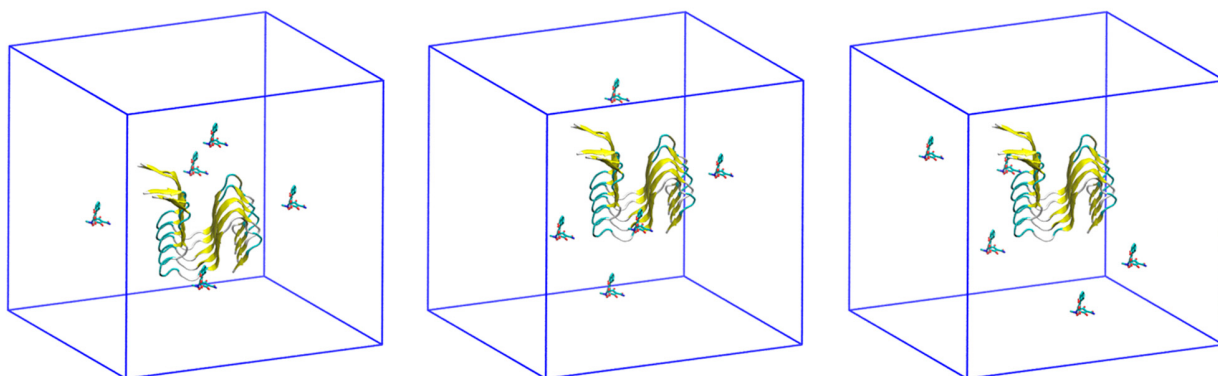**B**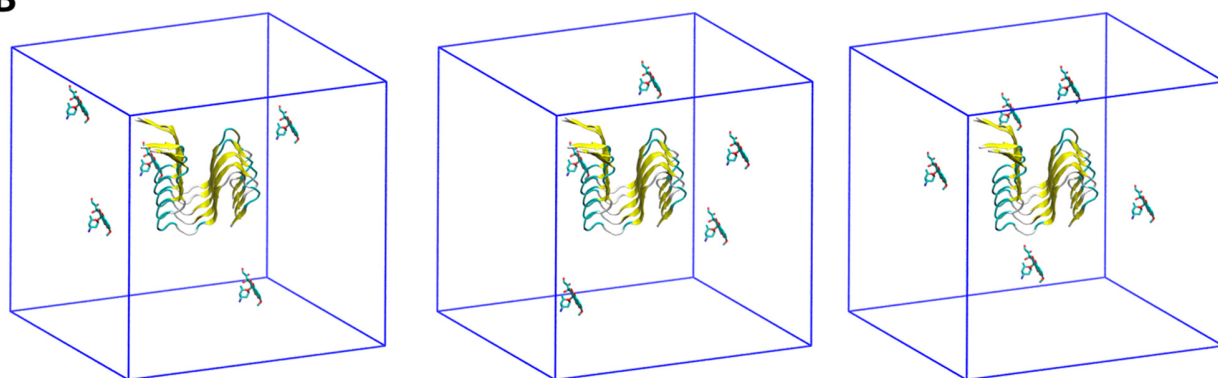**C**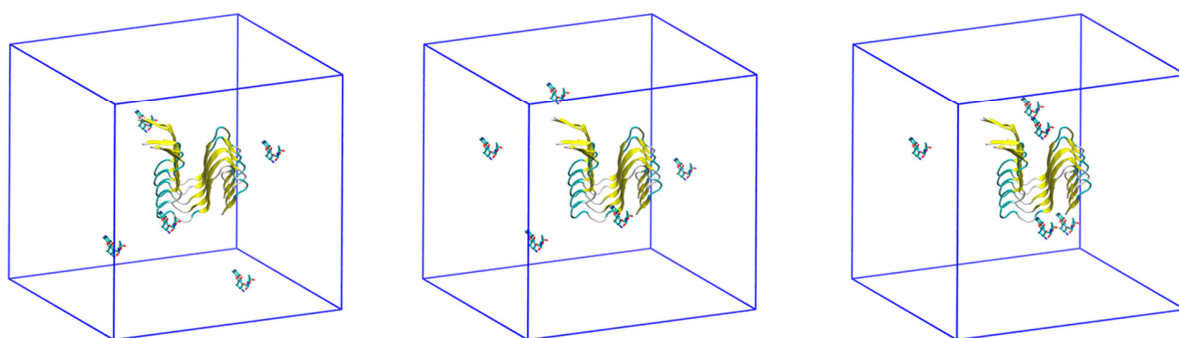

**Figure S1.** Starting configurations for the molecular dynamics simulation of Aβ42 in the presence of doxycycline (A), IDOX (B) and gentamicin (C).

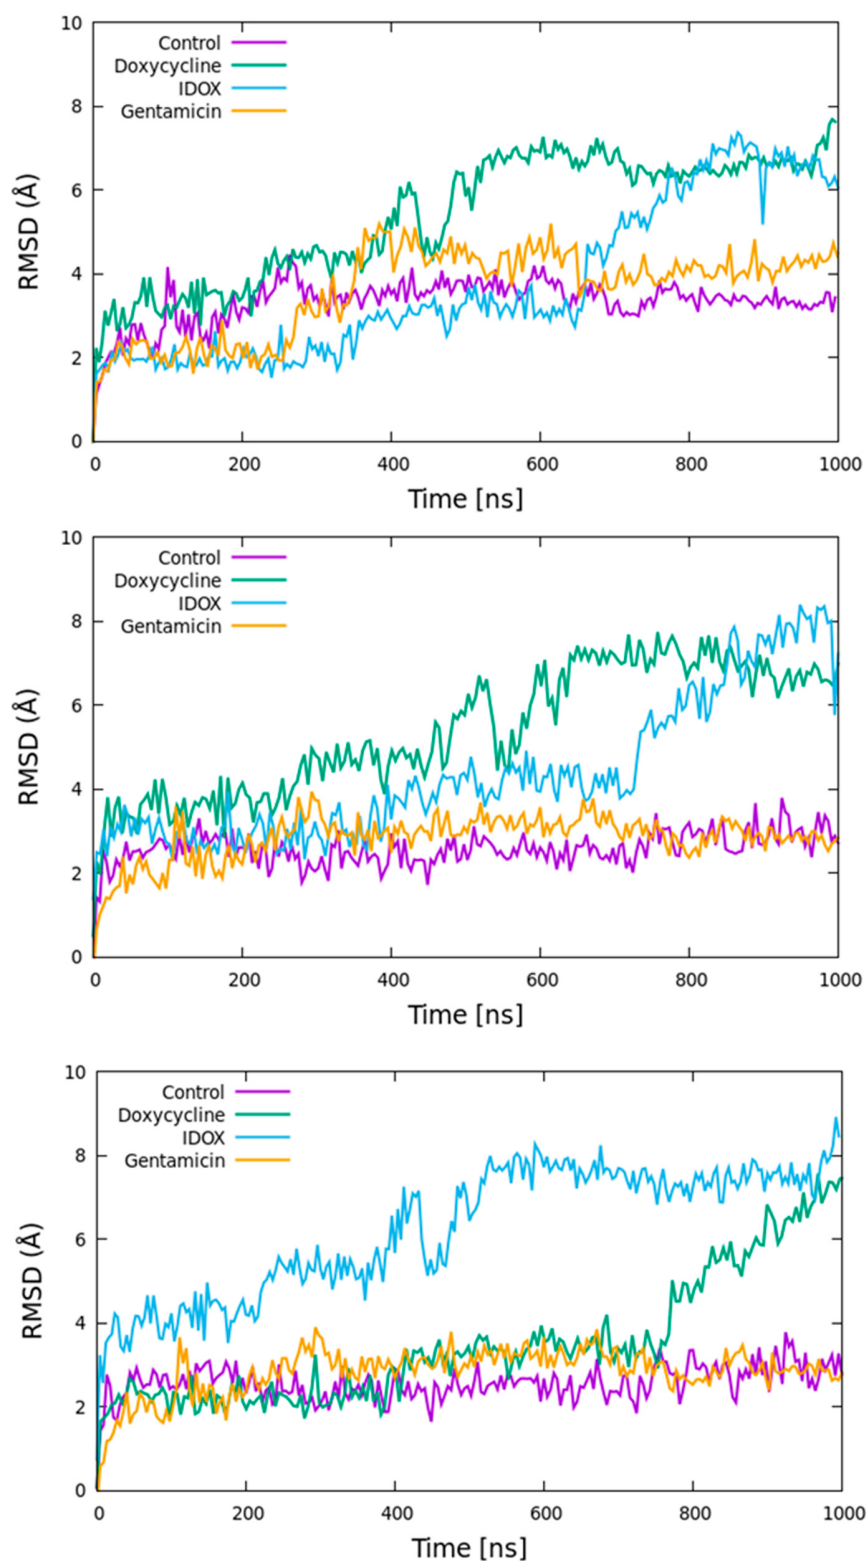

**Figure S2.** RMSD calculated for the three replicas of each system

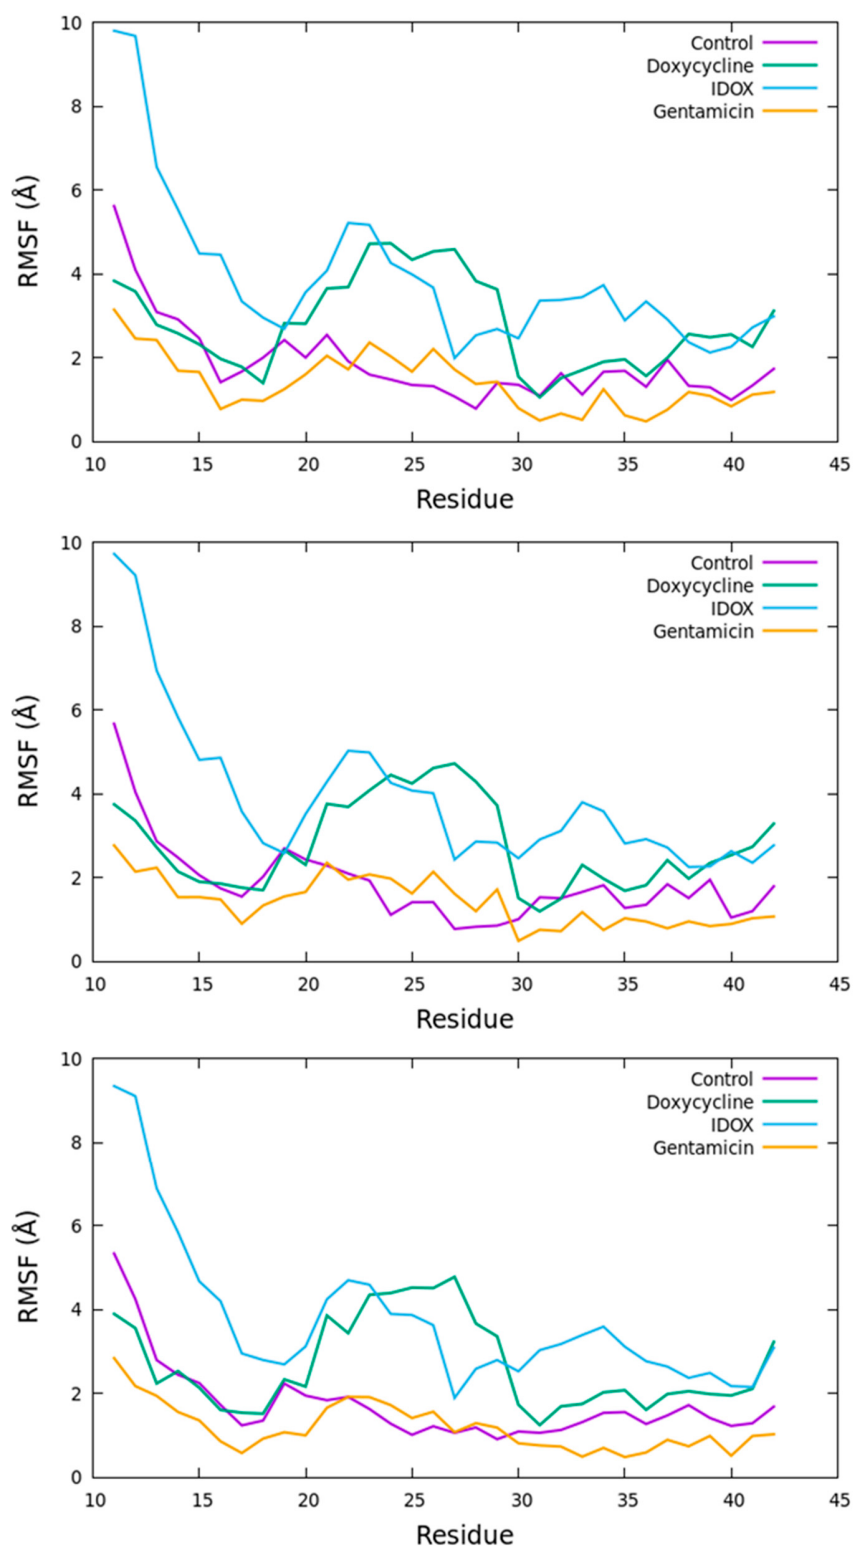

**Figure S2.** RMSF calculated for the three replicas of each system.
